# Supplementary material for: Searching for silicate nonlinear optical materials by combining calculation and experiment
Source: Royal Society of Chemistry journal article supplement (doi:10.1039/d3qi00979c), 2023-01-01
Supplement: d3qi00979c1.pdf [file d3qi00979c1.pdf]

*Supporting Information For*

**Searching for Silicate Nonlinear Optical Materials in by  
Combining Calculation and Experiment**

Jingjing Zhang, Ruqing Wei, Daqing Yang, Ying Wang, Bingbing Zhang\*

College of Chemistry and Materials Science, Key Laboratory of Medicinal Chemistry and Molecular Diagnosis of the Ministry of Education, Key Laboratory of Analytical Science and Technology of Hebei Province, Hebei University, Baoding 071002, China.

Corresponding Author Bingbing Zhang

Email: zhangbb@hbu.edu.cn

**Figure S1.** Rietveld refinement of PXRD of synthesized pure polycrystalline of  $\text{KNbSi}_2\text{O}_7$ .

**Figure S2.** Rietveld refinement of PXRD of synthesized pure polycrystalline of  $\text{PbZnSiO}_4$ .

**Figure S3.** Rietveld refinement of PXRD of synthesized pure polycrystalline of  $\text{Na}_2\text{TiSiO}_5$ .

**Figure S4.** (a) Partial DOS of  $\text{PbZnSiO}_4$ , (b) Partial DOS of  $\text{Na}_2\text{TiSiO}_5$ .

**Figure S5.** SHG density at (a) occupied state and (b) unoccupied state of  $\text{PbZnSiO}_4$ .

**Figure S6.** SHG density at (a) occupied state and (b) unoccupied state of  $\text{Na}_2\text{TiSiO}_5$ .

**Table S1.** Crystallographic data, details of the experiment and Rietveld refinement of PXRD.  
**Calculation results of 253 silicates**

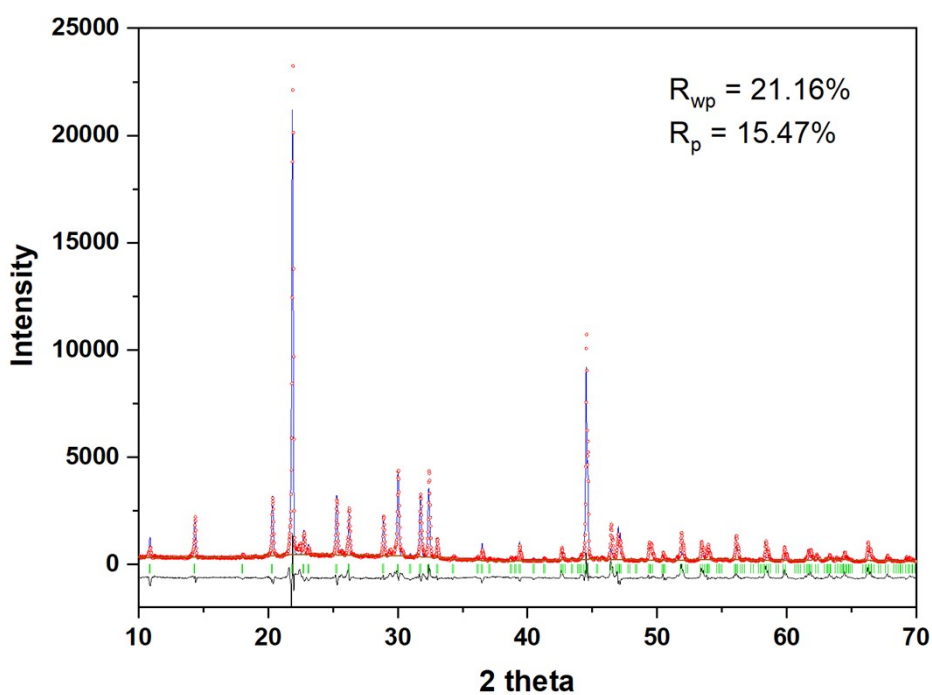

**Figure S1.** Rietveld refinement of PXRD of synthesized pure polycrystalline of KNbSi<sub>2</sub>O<sub>7</sub>. Experimental (red circles) and calculated (blue line) PXRD patterns and their difference (black line) for the PXRD Rietveld refinement of KNbSi<sub>2</sub>O<sub>7</sub>. The short vertical green lines show the positions of Bragg reflections of the calculated pattern.

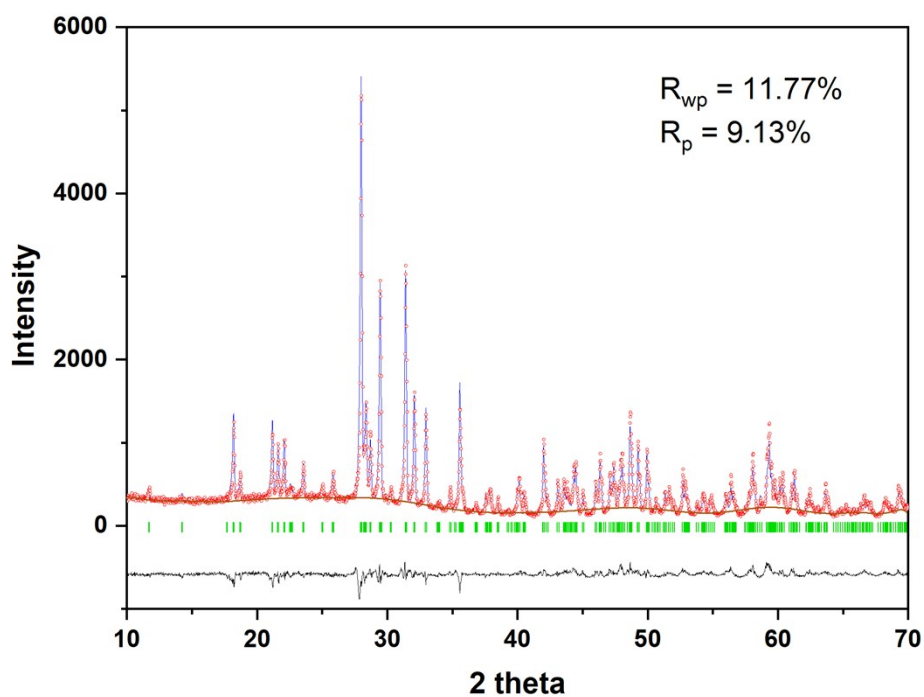

**Figure S2.** Rietveld refinement of PXRD of synthesized pure polycrystalline of PbZnSiO<sub>4</sub>.

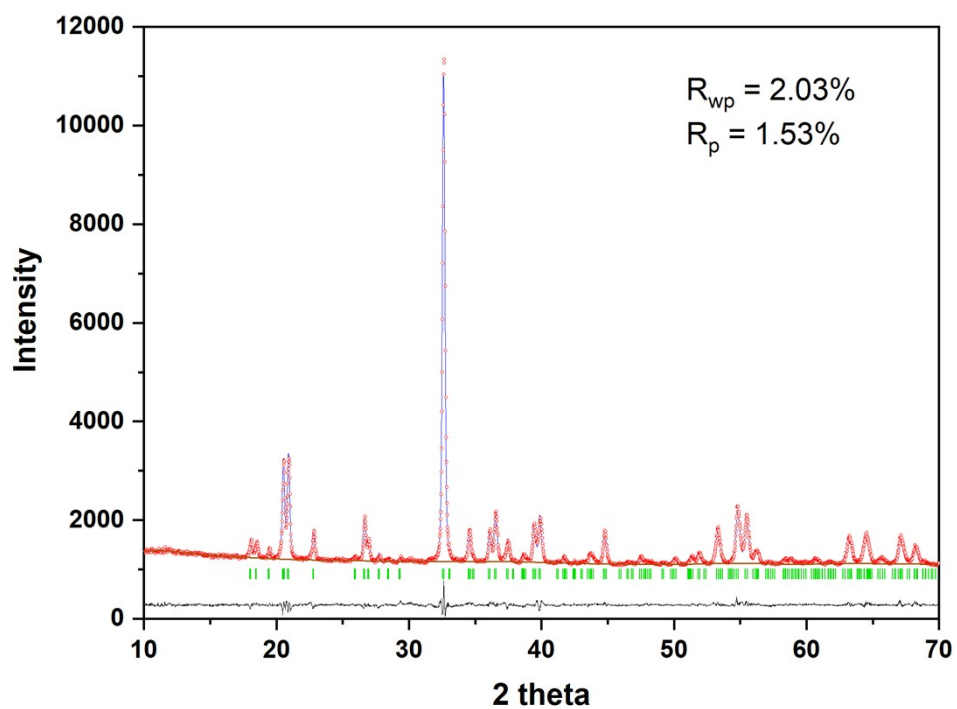

Figure S3. Rietveld refinement of PXR D of synthesized pure polycrystalline of  $\text{Na}_2\text{TiSiO}_5$ .

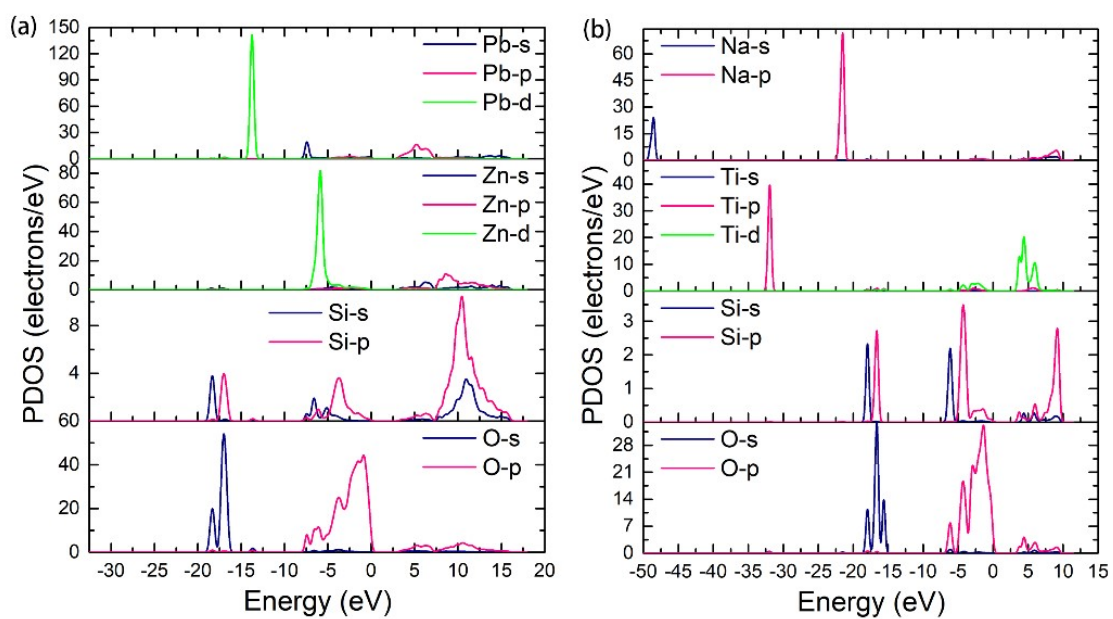

Figure S4. (a) Partial DOS of  $\text{PbZnSiO}_4$ , (b) Partial DOS of  $\text{Na}_2\text{TiSiO}_5$ .

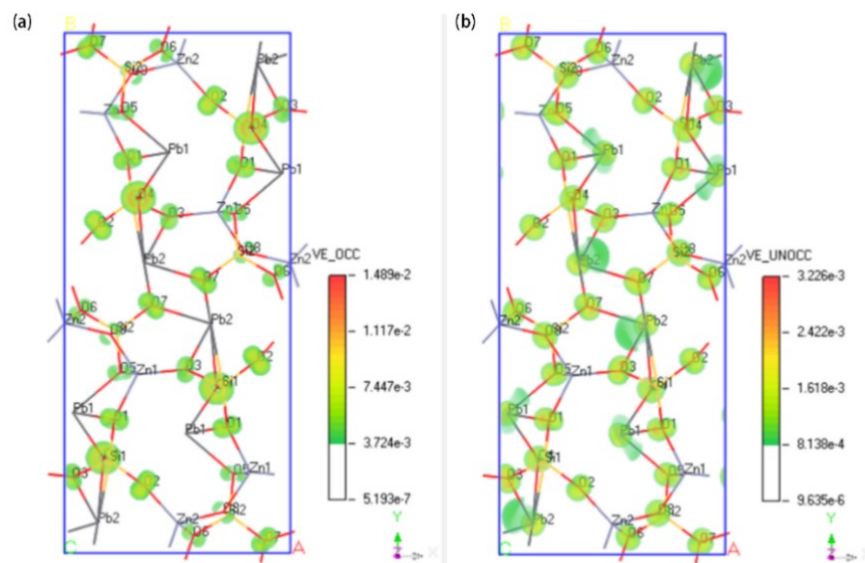

Figure S5. SHG density at (a) occupied state and (b) unoccupied state of  $\text{PbZnSiO}_4$ .

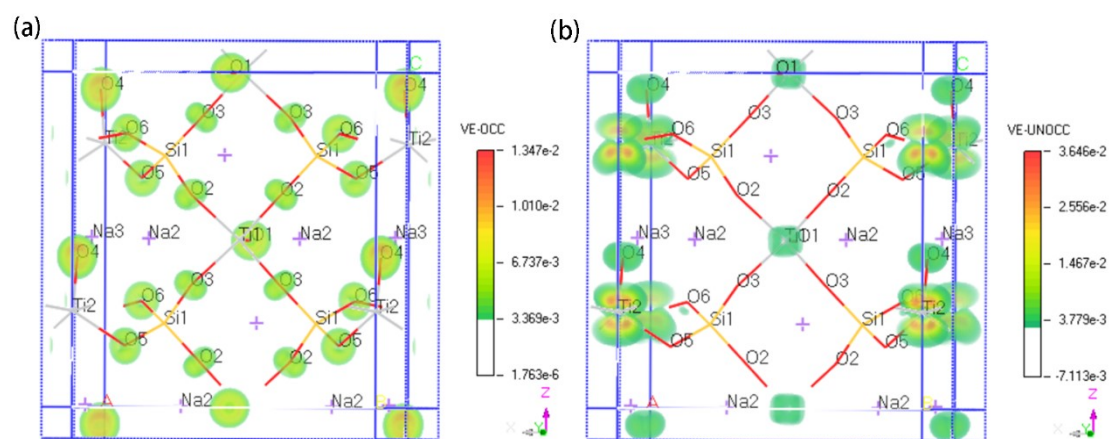

Figure S6. SHG density at (a) occupied state and (b) unoccupied state of  $\text{Na}_2\text{TiSiO}_5$ .

**Table S1.** Crystallographic data, details of the experiment and Rietveld refinement of PXRD.

| Empirical formula                         | KNbSi <sub>2</sub> O <sub>7</sub>    | PbZn(SiO <sub>4</sub> )  | Na <sub>2</sub> TiSiO <sub>5</sub> |
|-------------------------------------------|--------------------------------------|--------------------------|------------------------------------|
| Crystal system                            | tetragonal                           | orthorhombic             | orthorhombic                       |
| Space group (number)                      | <i>P4bm</i>                          | <i>Pna2</i> <sub>1</sub> | <i>Pmc2</i> <sub>1</sub>           |
| <i>a</i> [Å]                              | 8.7380                               | 8.2319                   | 9.12978                            |
| <i>b</i> [Å]                              | 8.7380                               | 18.9654                  | 4.79649                            |
| <i>c</i> [Å]                              | 8.1290                               | 5.0439                   | 9.824724                           |
| $\alpha$ (°)                              | 90                                   | 90                       | 90                                 |
| $\beta$ (°)                               | 90                                   | 90                       | 90                                 |
| $\gamma$ (°)                              | 90                                   | 90                       | 90                                 |
| Volume [Å <sup>3</sup> ]                  | 620.67                               | 787.46                   | 430.23                             |
| <i>Z</i>                                  | 4                                    | 8                        | 4                                  |
| $\rho_{\text{calc}}$ [gcm <sup>-3</sup> ] | 3.21212                              | 6.1516                   | 3.11749                            |
| Radiation                                 | CuK $\alpha$ ( $\lambda = 1.5408$ Å) |                          |                                    |
| Instrument type                           | Bragg-Brentano                       |                          |                                    |
| <i>R</i> <sub>wp</sub>                    | 0.2116                               | 0.1177                   | 0.0203                             |
| <i>R</i> <sub>p</sub>                     | 0.1547                               | 0.0913                   | 0.0153                             |

The chemical formula, ICSD collection-code, space group, band gap ( $E_g$ ), birefringence ( $\Delta n$ ), second-order susceptibility ( $\chi^{(2)}$ ), and the maximum  $\chi^{(2)}$  tensor of all 253 structures.

| Formula                                             | ICSD   | SG                                              | $E_g$ -GGA | $\Delta n$ | $\chi^{(2)}$ (pm/V)                                                                                                                  | $ \chi^{(2)} _{\max}$ (pm/V) |
|-----------------------------------------------------|--------|-------------------------------------------------|------------|------------|--------------------------------------------------------------------------------------------------------------------------------------|------------------------------|
| Ag <sub>2</sub> SiO <sub>3</sub>                    | 36589  | <i>P2<sub>1</sub>2<sub>1</sub>2<sub>1</sub></i> | 0.835      | 0.037      | $\chi_{123}=3.926$                                                                                                                   | 3.926                        |
| Ag <sub>6</sub> (Si <sub>2</sub> O <sub>7</sub> )   | 404355 | <i>P2<sub>1</sub>2<sub>1</sub>2<sub>1</sub></i> | 0.394      | 0.149      | $\chi_{112}=-22.530$<br>$\chi_{123}=-10.709$<br>$\chi_{222}=2.584$<br>$\chi_{233}=5.594$                                             | 22.53                        |
| Ba(Li <sub>2</sub> SiO <sub>4</sub> )               | 260259 | <i>P6<sub>3</sub>cm</i>                         | 4.444      | 0          | $\chi_{113}=0.510$<br>$\chi_{223}=0.510$<br>$\chi_{333}=-7.386$                                                                      | 7.386                        |
| Ba(Si <sub>4</sub> O <sub>9</sub> )                 | 80067  | <i>P-6c2</i>                                    | 4.372      | 0.017      | $\chi_{111}=1.115$<br>$\chi_{122}=-1.115$                                                                                            | 1.115                        |
| BaBe(SiO <sub>4</sub> )                             | 86792  | <i>Cm</i>                                       | 4.742      | 0.02       | $\chi_{111}=-5.791$<br>$\chi_{113}=-1.228$<br>$\chi_{122}=0.905$<br>$\chi_{133}=3.306$<br>$\chi_{223}=-2.249$<br>$\chi_{333}=4.410$  | 5.791                        |
| BaBe <sub>2</sub> (Si <sub>2</sub> O <sub>7</sub> ) | 250005 | <i>Pm</i>                                       | 5.821      | 0.016      | $\chi_{112}=-0.002$<br>$\chi_{113}=-0.638$<br>$\chi_{222}=-0.002$<br>$\chi_{223}=-1.092$<br>$\chi_{233}=0.001$<br>$\chi_{333}=2.961$ | 2.961                        |
| BaBe <sub>2</sub> (Si <sub>2</sub> O <sub>7</sub> ) | 151563 | <i>Pmn2<sub>1</sub></i>                         | 5.825      | 0.017      | $\chi_{113}=0.655$<br>$\chi_{223}=1.093$<br>$\chi_{333}=-2.938$                                                                      | 2.938                        |
| BaBe <sub>2</sub> (Si <sub>2</sub> O <sub>7</sub> ) | 166582 | <i>Pn2<sub>1</sub>a</i>                         | 5.646      | 0.021      | $\chi_{112}=0.024$<br>$\chi_{222}=0.024$<br>$\chi_{233}=0.004$                                                                       | 0.024                        |
| BaBe <sub>2</sub> (Si <sub>2</sub> O <sub>7</sub> ) | 22341  | <i>Pn2<sub>1</sub>a</i>                         | 5.651      | 0.021      | $\chi_{222}=0.002$<br>$\chi_{233}=0.002$                                                                                             | 0.002                        |
| BaBe <sub>2</sub> Si <sub>2</sub> O <sub>7</sub>    | 263133 | <i>Pmn2<sub>1</sub></i>                         | 5.827      | 0.017      | $\chi_{113}=0.627$<br>$\chi_{223}=1.094$<br>$\chi_{333}=-2.962$                                                                      | 2.962                        |
| BaHf(SiO <sub>3</sub> ) <sub>3</sub>                | 183835 | <i>P-6c2</i>                                    | 4.688      | 0.004      | $\chi_{111}=0.221$<br>$\chi_{122}=-0.221$                                                                                            | 0.221                        |
| BaMg(SiO <sub>4</sub> )                             | 73776  | <i>P6<sub>3</sub></i>                           | 4.169      | 0.004      | $\chi_{113}=1.765$<br>$\chi_{223}=1.765$<br>$\chi_{333}=-1.216$                                                                      | 1.765                        |
| BaN <sub>2</sub> (AlSiO <sub>4</sub> ) <sub>4</sub> | 156658 | <i>lba2</i>                                     | 4.913      | 0.006      | $\chi_{113}=0.197$<br>$\chi_{223}=0.505$<br>$\chi_{333}=-0.605$                                                                      | 0.605                        |
| BaN <sub>2</sub> (AlSiO <sub>4</sub> ) <sub>4</sub> | 156657 | <i>lba2</i>                                     | 4.913      | 0.006      | $\chi_{113}=0.192$<br>$\chi_{223}=0.504$<br>$\chi_{333}=-0.603$                                                                      | 0.603                        |
| BaSiO <sub>3</sub>                                  | 6245   | <i>P2<sub>1</sub>2<sub>1</sub>2<sub>1</sub></i> | 4.69       | 0.014      | $\chi_{123}=0.635$                                                                                                                   | 0.635                        |
| BaSn(Si <sub>3</sub> O <sub>9</sub> )               | 10385  | <i>P-6c2</i>                                    | 4.402      | 0.02       | $\chi_{111}=0.939$<br>$\chi_{122}=-0.938$                                                                                            | 0.939                        |
| BaTi(Si <sub>3</sub> O <sub>9</sub> )               | 290231 | <i>P3c</i>                                      | 3.378      | 0.034      | $\chi_{111}=0.005$<br>$\chi_{112}=-0.286$<br>$\chi_{113}=-0.003$<br>$\chi_{122}=0.001$<br>$\chi_{123}=-0.005$                        | 0.290                        |

|                                                                                  |        |                          |       |          |                                                                                                                                                            |        |
|----------------------------------------------------------------------------------|--------|--------------------------|-------|----------|------------------------------------------------------------------------------------------------------------------------------------------------------------|--------|
|                                                                                  |        |                          |       |          | $\chi_{133}=0.006$<br>$\chi_{222}=0.290$<br>$\chi_{223}=0.003$<br>$\chi_{233}=0.003$<br>$\chi_{333}=-0.019$                                                |        |
| BaTi(Si <sub>3</sub> O <sub>9</sub> )                                            | 18100  | <i>P-6c2</i>             | 3.366 | 0.033    | $\chi_{111}=0.209$<br>$\chi_{122}=-0.209$                                                                                                                  | 0.209  |
| BaY <sub>6</sub> (Si <sub>3</sub> B <sub>6</sub> O <sub>24</sub> )F <sub>2</sub> | 30674  | <i>P3</i>                | 5.395 | 0.033    | $\chi_{111}=-0.768$<br>$\chi_{112}=-0.002$<br>$\chi_{113}=4.106$<br>$\chi_{122}=0.768$<br>$\chi_{222}=0.002$<br>$\chi_{223}=4.106$<br>$\chi_{333}=-5.923$  | 5.923  |
| BaZn(SiO <sub>4</sub> )                                                          | 73777  | <i>P6<sub>3</sub></i>    | 3.404 | 0.032    | $\chi_{113}=0.632$<br>$\chi_{223}=0.632$<br>$\chi_{333}=1.771$                                                                                             | 1.771  |
| Ba <sub>2</sub> (TiO)(Si <sub>2</sub> O <sub>7</sub> )                           | 4451   | <i>P4bm</i>              | 4.059 | 0.060    | $\chi_{113}=6.450$<br>$\chi_{223}=6.450$<br>$\chi_{333}=-21.409$                                                                                           | 21.40  |
| Ba <sub>2</sub> Ca(BSi <sub>2</sub> O <sub>7</sub> ) <sub>2</sub>                | 193536 | <i>I-42m</i>             | 4.918 | 0.003    | $\chi_{123}=-1.787$                                                                                                                                        | 1.787  |
| Ba <sub>2</sub> In <sub>2</sub> Si <sub>3</sub> O <sub>10</sub> S                | 430641 | <i>Pca2<sub>1</sub></i>  | 3.722 | 0.024    | $\chi_{113}=-1.059$<br>$\chi_{223}=1.280$<br>$\chi_{333}=-0.504$                                                                                           | 1.28   |
| Ba <sub>2</sub> Mg(Si <sub>2</sub> O <sub>7</sub> )                              | 81117  | <i>P-42<sub>1</sub>m</i> | 4.559 | 0.023    | $\chi_{123}=-0.657$                                                                                                                                        | 0.657  |
| Ba <sub>2</sub> TiSi <sub>2</sub> O <sub>8</sub>                                 | 201844 | <i>P4bm</i>              | 4.045 | 0.060    | $\chi_{113}=-6.550$<br>$\chi_{223}=-6.550$<br>$\chi_{333}=21.424$                                                                                          | 21.424 |
| Ba <sub>2</sub> TiSi <sub>2</sub> O <sub>8</sub>                                 | 201845 | <i>P4bm</i>              | 4.051 | 0.061    | $\chi_{113}=-6.517$<br>$\chi_{223}=-6.517$<br>$\chi_{333}=21.460$                                                                                          | 21.460 |
| Ba <sub>2</sub> Y <sub>3</sub> (SiO <sub>4</sub> ) <sub>2</sub> F <sub>5</sub>   | 290289 | <i>Pba2</i>              | 5.092 | 3.50E-02 | $\chi_{113}=-0.756$<br>$\chi_{223}=0.704$<br>$\chi_{333}=-3.347$                                                                                           | 3.347  |
| Ba <sub>3</sub> (NbGa <sub>3</sub> Si <sub>2</sub> O <sub>14</sub> )             | 154215 | <i>P321</i>              | 3.003 | 0.084    | $\chi_{112}=-1.272$<br>$\chi_{222}=1.272$                                                                                                                  | 1.272  |
| Ba <sub>3</sub> Nb <sub>6</sub> Si <sub>4</sub> O <sub>26</sub>                  | 15934  | <i>P-62m</i>             | 1.996 | 0.315    | $\chi_{112}=2.227$<br>$\chi_{222}=-2.227$                                                                                                                  | 2.227  |
| Ba <sub>3</sub> Si <sub>4</sub> Nb <sub>6</sub> O <sub>26</sub>                  | 16029  | <i>P-62m</i>             | 1.997 | 0.313    | $\chi_{112}=2.385$<br>$\chi_{222}=-2.386$                                                                                                                  | 2.386  |
| Ba <sub>3</sub> Si <sub>4</sub> Ta <sub>6</sub> O <sub>26</sub>                  | 18317  | <i>P-62m</i>             | 3.261 | 0.148    | $\chi_{112}=0.208$<br>$\chi_{222}=-0.208$                                                                                                                  | 0.208  |
| Ba <sub>3</sub> Si <sub>6</sub> O <sub>9</sub> N <sub>4</sub>                    | 259431 | <i>P3</i>                | 4.513 | 0.01     | $\chi_{111}=1.003$<br>$\chi_{112}=-0.845$<br>$\chi_{113}=-0.031$<br>$\chi_{122}=-1.003$<br>$\chi_{222}=0.845$<br>$\chi_{223}=-0.031$<br>$\chi_{333}=0.757$ | 1.003  |
| Ba <sub>3</sub> Si <sub>6</sub> O <sub>9</sub> N <sub>4</sub>                    | 415918 | <i>P3</i>                | 4.519 | 0.01     | $\chi_{111}=0.991$<br>$\chi_{112}=-0.839$<br>$\chi_{113}=-0.034$<br>$\chi_{122}=-0.991$<br>$\chi_{222}=0.839$<br>$\chi_{223}=-0.034$<br>$\chi_{333}=0.709$ | 0.991  |

|                                                                   |        |                                                 |       |       |                                                                                                                                                                                                                                |       |
|-------------------------------------------------------------------|--------|-------------------------------------------------|-------|-------|--------------------------------------------------------------------------------------------------------------------------------------------------------------------------------------------------------------------------------|-------|
| Ba <sub>3</sub> Si <sub>6</sub> O <sub>9</sub> N <sub>4</sub>     | 259432 | <i>P3</i>                                       | 4.512 | 0.01  | $\chi_{111}=0.988$<br>$\chi_{112}=-0.852$<br>$\chi_{113}=-0.048$<br>$\chi_{122}=-0.988$<br>$\chi_{222}=0.852$<br>$\chi_{223}=-0.048$<br>$\chi_{333}=0.665$                                                                     | 0.988 |
| Ba <sub>3</sub> Ta <sub>6</sub> Si <sub>4</sub> O <sub>26</sub>   | 15935  | <i>P-62m</i>                                    | 3.265 | 0.149 | $\chi_{112}=0.204$<br>$\chi_{222}=-0.204$                                                                                                                                                                                      | 0.204 |
| Ba <sub>4</sub> Si <sub>6</sub> O <sub>16</sub>                   | 20038  | <i>P2<sub>1</sub></i>                           | 4.763 | 0.027 | $\chi_{113}=0.211$<br>$\chi_{123}=0.046$<br>$\chi_{223}=0.331$<br>$\chi_{333}=-0.111$                                                                                                                                          | 0.331 |
| Bi <sub>2</sub> O <sub>2</sub> (SiO <sub>3</sub> )                | 30995  | <i>Cmc2<sub>1</sub></i>                         | 3.055 | 0.06  | $\chi_{113}=4.165$<br>$\chi_{223}=-0.565$<br>$\chi_{333}=3.212$                                                                                                                                                                | 4.165 |
| CaAl(AlSi)O <sub>6</sub>                                          | 239022 | <i>P1</i>                                       | 4.993 | 0.044 | $\chi_{111}=-0.194$<br>$\chi_{112}=-0.059$<br>$\chi_{113}=-0.007$<br>$\chi_{122}=0.127$<br>$\chi_{123}=-0.009$<br>$\chi_{133}=0.020$<br>$\chi_{222}=-0.467$<br>$\chi_{223}=-0.177$<br>$\chi_{233}=0.271$<br>$\chi_{333}=0.024$ | 0.467 |
| CaAl(AlSi)O <sub>6</sub>                                          | 239023 | <i>P1</i>                                       | 4.992 | 0.044 | $\chi_{111}=0.191$<br>$\chi_{112}=-0.057$<br>$\chi_{113}=0.008$<br>$\chi_{122}=-0.127$<br>$\chi_{123}=-0.010$<br>$\chi_{133}=-0.021$<br>$\chi_{222}=-0.466$<br>$\chi_{223}=0.177$<br>$\chi_{233}=0.270$<br>$\chi_{333}=-0.027$ | 0.466 |
| CaAl(AlSi)O <sub>6</sub>                                          | 239021 | <i>P1</i>                                       | 4.976 | 0.034 | -                                                                                                                                                                                                                              | 0     |
| CaBa(SiO <sub>4</sub> )                                           | 67092  | <i>P6<sub>3</sub>mc</i>                         | 4.507 | 0.04  | $\chi_{113}=1.356$<br>$\chi_{223}=1.356$<br>$\chi_{333}=1.658$                                                                                                                                                                 | 1.658 |
| CaNa(BeSi <sub>2</sub> O <sub>6</sub> )F                          | 15314  | <i>P2<sub>1</sub>2<sub>1</sub>2<sub>1</sub></i> | 5.539 | 0.009 | $\chi_{123}=0.184$                                                                                                                                                                                                             | 0.184 |
| CaSr(SiO <sub>4</sub> )                                           | 20544  | <i>Pna2<sub>1</sub></i>                         | 4.711 | 0.022 | $\chi_{113}=0.293$<br>$\chi_{223}=0.023$<br>$\chi_{333}=-0.706$                                                                                                                                                                | 0.706 |
| CaZr(Si <sub>2</sub> O <sub>7</sub> )                             | 203131 | <i>C2</i>                                       | 4.54  | 0.062 | $\chi_{112}=-0.532$<br>$\chi_{123}=-6.280$<br>$\chi_{222}=-3.299$<br>$\chi_{233}=2.472$                                                                                                                                        | 6.28  |
| Ca <sub>14</sub> Mg <sub>2</sub> (SiO <sub>4</sub> ) <sub>8</sub> | 254354 | <i>P2nn</i>                                     | 4.898 | 0.021 | $\chi_{111}=-1.658$<br>$\chi_{122}=0.041$<br>$\chi_{133}=0.149$                                                                                                                                                                | 1.658 |
| Ca <sub>14</sub> Mg <sub>2</sub> (SiO <sub>4</sub> ) <sub>8</sub> | 254355 | <i>P2nn</i>                                     | 4.9   | 0.021 | $\chi_{111}=-1.560$<br>$\chi_{122}=-0.021$<br>$\chi_{133}=0.196$                                                                                                                                                               | 1.56  |
| Ca <sub>2</sub> (SiO <sub>3</sub> Cl <sub>2</sub> )               | 200221 | <i>I4</i>                                       | 5.363 | 0.014 | $\chi_{113}=0.030$<br>$\chi_{223}=0.030$<br>$\chi_{333}=-0.023$                                                                                                                                                                | 0.03  |



|                                                                   |        |                                     |       |          |                                                                                                                                                                   |        |
|-------------------------------------------------------------------|--------|-------------------------------------|-------|----------|-------------------------------------------------------------------------------------------------------------------------------------------------------------------|--------|
| Ca <sub>2</sub> (SiO <sub>4</sub> )                               | 182054 | <i>P6<sub>3</sub>mc</i>             | 3.546 | 0.078    | χ <sub>113</sub> =-0.707<br>χ <sub>223</sub> =-0.708<br>χ <sub>333</sub> =-10.236                                                                                 | 10.236 |
| Ca <sub>2</sub> (SiO <sub>4</sub> )                               | 182053 | <i>P6<sub>3</sub>mc</i>             | 3.553 | 0.078    | χ <sub>113</sub> =-0.724<br>χ <sub>223</sub> =-0.724<br>χ <sub>333</sub> =-10.191                                                                                 | 10.191 |
| Ca <sub>2</sub> (SiO <sub>4</sub> )                               | 82996  | <i>Pna2<sub>1</sub></i>             | 4.682 | 0.021    | χ <sub>113</sub> =-0.282<br>χ <sub>223</sub> =-1.079<br>χ <sub>333</sub> =1.372                                                                                   | 1.372  |
| Ca <sub>2</sub> Al <sub>2</sub> (SiO <sub>4</sub> )O <sub>3</sub> | 24588  | <i>P-42<sub>1</sub>m</i>            | 4.743 | 0.009    | χ <sub>123</sub> =-0.940                                                                                                                                          | 0.94   |
| Ca <sub>2</sub> B <sub>2</sub> SiO <sub>7</sub>                   | 263515 | <i>P2<sub>1</sub>2<sub>1</sub>2</i> | 6.03  | 0.015    | χ <sub>123</sub> =0.632                                                                                                                                           | 0.632  |
| Ca <sub>2</sub> Be(Si <sub>2</sub> O <sub>7</sub> )               | 31234  | <i>P-42<sub>1</sub>m</i>            | 5.3   | 0.025    | χ <sub>123</sub> =-0.293                                                                                                                                          | 0.293  |
| Ca <sub>2</sub> Be(Si <sub>2</sub> O <sub>7</sub> )               | 94063  | <i>P-42<sub>1</sub>m</i>            | 5.298 | 0.025    | χ <sub>123</sub> =0.285                                                                                                                                           | 0.285  |
| Ca <sub>2</sub> Mg(Si <sub>2</sub> O <sub>7</sub> )               | 187931 | <i>P-42<sub>1</sub>m</i>            | 4.722 | 0.014    | χ <sub>123</sub> =-0.035                                                                                                                                          | 0.035  |
| Ca <sub>2</sub> Mg(Si <sub>2</sub> O <sub>7</sub> )               | 50065  | <i>P-42<sub>1</sub>m</i>            | 4.721 | 0.014    | χ <sub>123</sub> =-0.031                                                                                                                                          | 0.031  |
| Ca <sub>2</sub> Mg(Si <sub>2</sub> O <sub>7</sub> )               | 39924  | <i>P-42<sub>1</sub>m</i>            | 4.722 | 0.014    | χ <sub>113</sub> =-0.003<br>χ <sub>123</sub> =-0.024<br>χ <sub>223</sub> =0.003                                                                                   | 0.024  |
| Ca <sub>2</sub> Mg(Si <sub>2</sub> O <sub>7</sub> )               | 26683  | <i>P-42<sub>1</sub>m</i>            | 4.721 | 0.014    | χ <sub>123</sub> =-0.022                                                                                                                                          | 0.022  |
| Ca <sub>2</sub> Mg(Si <sub>2</sub> O <sub>7</sub> )               | 92773  | <i>P-42<sub>1</sub>m</i>            | 4.721 | 1.40E-02 | χ <sub>123</sub> =0.021                                                                                                                                           | 0.021  |
| Ca <sub>2</sub> Mg(Si <sub>2</sub> O <sub>7</sub> )               | 160352 | <i>P-42<sub>1</sub>m</i>            | 4.726 | 0.014    | χ <sub>123</sub> =-0.018                                                                                                                                          | 0.018  |
| Ca <sub>2</sub> Mg(Si <sub>2</sub> O <sub>7</sub> )               | 158177 | <i>P-42<sub>1</sub>m</i>            | 4.723 | 0.014    | χ <sub>123</sub> =-0.016                                                                                                                                          | 0.016  |
| Ca <sub>2</sub> Mg(Si <sub>2</sub> O <sub>7</sub> )               | 192373 | <i>P-42<sub>1</sub>m</i>            | 4.725 | 0.014    | χ <sub>123</sub> =-0.013                                                                                                                                          | 0.013  |
| Ca <sub>2</sub> Mg(Si <sub>2</sub> O <sub>7</sub> )               | 34805  | <i>P-42<sub>1</sub>m</i>            | 4.721 | 0.014    | χ <sub>123</sub> =0.008                                                                                                                                           | 0.008  |
| Ca <sub>2</sub> Mg(Si <sub>2</sub> O <sub>7</sub> )               | 85088  | <i>P-42<sub>1</sub>m</i>            | 4.725 | 0.014    | χ <sub>113</sub> =-0.003<br>χ <sub>123</sub> =-0.004<br>χ <sub>223</sub> =0.003                                                                                   | 0.004  |
| Ca <sub>2</sub> Mg(Si <sub>2</sub> O <sub>7</sub> )               | 67691  | <i>P-42<sub>1</sub>m</i>            | 4.726 | 0.014    | χ <sub>123</sub> =0.003                                                                                                                                           | 0.003  |
| Ca <sub>2</sub> Mg(Si <sub>2</sub> O <sub>7</sub> )               | 85089  | <i>P-42<sub>1</sub>m</i>            | 4.725 | 0.014    | χ <sub>113</sub> =-0.003<br>χ <sub>123</sub> =-0.002<br>χ <sub>223</sub> =0.003                                                                                   | 0.003  |
| Ca <sub>2</sub> MgSi <sub>2</sub> O <sub>7</sub>                  | 100736 | <i>P-42<sub>1</sub>m</i>            | 4.719 | 0.014    | χ <sub>123</sub> =-0.007                                                                                                                                          | 0.007  |
| Ca <sub>2</sub> SiB <sub>2</sub> O <sub>7</sub>                   | 5244   | <i>P-42<sub>1</sub>m</i>            | 6.028 | 0.015    | χ <sub>123</sub> =0.636                                                                                                                                           | 0.636  |
| Ca <sub>2</sub> Zn(Si <sub>2</sub> O <sub>7</sub> )               | 186944 | <i>P-42<sub>1</sub>m</i>            | 4.288 | 0.011    | χ <sub>123</sub> =-1.046                                                                                                                                          | 1.046  |
| Ca <sub>2</sub> Zn(Si <sub>2</sub> O <sub>7</sub> )               | 18114  | <i>P-42<sub>1</sub>m</i>            | 4.287 | 0.012    | χ <sub>123</sub> =-0.982                                                                                                                                          | 0.982  |
| Ca <sub>2</sub> ZnSi <sub>2</sub> O <sub>7</sub>                  | 30262  | <i>P-42<sub>1</sub>m</i>            | 4.284 | 0.011    | χ <sub>123</sub> =-0.996                                                                                                                                          | 0.996  |
| Ca <sub>3</sub> (SiO <sub>4</sub> )O                              | 24625  | <i>R3mH</i>                         | 3.355 | 0        | χ <sub>111</sub> =-1.242<br>χ <sub>113</sub> =2.238<br>χ <sub>122</sub> =1.242<br>χ <sub>223</sub> =2.238<br>χ <sub>333</sub> =-3.734                             | 3.734  |
| Ca <sub>3</sub> (SiO <sub>4</sub> )O                              | 81100  | <i>Cm</i>                           | 3.384 | 0.002    | χ <sub>111</sub> =-1.458<br>χ <sub>113</sub> =-0.484<br>χ <sub>122</sub> =1.393<br>χ <sub>133</sub> =0.022<br>χ <sub>223</sub> =-0.614<br>χ <sub>333</sub> =0.517 | 1.458  |
| Ca <sub>3</sub> (SiO <sub>4</sub> )O                              | 22501  | <i>R3mH</i>                         | 3.801 | 0.017    | χ <sub>111</sub> =-0.649<br>χ <sub>113</sub> =-0.587<br>χ <sub>122</sub> =0.649<br>χ <sub>223</sub> =-0.587<br>χ <sub>333</sub> =1.354                            | 1.354  |

|                                                                                   |        |                                                 |       |          |                                                                                                                                            |        |
|-----------------------------------------------------------------------------------|--------|-------------------------------------------------|-------|----------|--------------------------------------------------------------------------------------------------------------------------------------------|--------|
| Ca <sub>3</sub> (Si <sub>2</sub> O <sub>7</sub> )                                 | 424472 | <i>Ima2</i>                                     | 4.828 | 0.002    | $\chi_{113}=-0.409$<br>$\chi_{223}=-0.323$<br>$\chi_{333}=1.300$                                                                           | 1.3    |
| Ca <sub>3</sub> TaGa <sub>3</sub> Si <sub>2</sub> O <sub>14</sub>                 | 409728 | <i>P321</i>                                     | 4.222 | 0.078    | $\chi_{112}=0.006$<br>$\chi_{222}=-0.006$                                                                                                  | 0.006  |
| Ca <sub>3</sub> TaGa <sub>3</sub> Si <sub>2</sub> O <sub>14</sub>                 | 245381 | <i>P321</i>                                     | 4.219 | 0.077    | $\chi_{112}=0.017$<br>$\chi_{222}=-0.017$                                                                                                  | 0.017  |
| Ca <sub>3</sub> TaGa <sub>3</sub> Si <sub>2</sub> O <sub>14</sub>                 | 380525 | <i>P321</i>                                     | 4.216 | 0.077    | $\chi_{112}=0.033$<br>$\chi_{222}=-0.033$                                                                                                  | 0.033  |
| Ca <sub>6</sub> (SiO <sub>4</sub> )(Si <sub>3</sub> O <sub>10</sub> )             | 190040 | <i>I2cm</i>                                     | 4.817 | 1.00E-03 | $\chi_{111}=1.279$<br>$\chi_{122}=-0.324$<br>$\chi_{133}=-0.408$                                                                           | 1.279  |
| Ca <sub>6</sub> (SiO <sub>4</sub> )(Si <sub>3</sub> O <sub>10</sub> )             | 34354  | <i>I2cm</i>                                     | 4.816 | 1.00E-03 | $\chi_{111}=1.272$<br>$\chi_{122}=-0.337$<br>$\chi_{133}=-0.399$                                                                           | 1.272  |
| Ca <sub>7</sub> K(SiO <sub>4</sub> ) <sub>3</sub> F <sub>3</sub>                  | 380452 | <i>P3c</i>                                      | 4.903 | 0.007    | $\chi_{112}=1.542$<br>$\chi_{113}=0.148$<br>$\chi_{222}=-1.542$<br>$\chi_{223}=0.148$<br>$\chi_{333}=0.123$                                | 1.542  |
| Cr <sub>4</sub> Br <sub>2</sub> (Si <sub>2</sub> O <sub>7</sub> )                 | 82687  | <i>Pc</i>                                       | 1.304 | 0.227    | $\chi_{111}=-12.492$<br>$\chi_{113}=-22.160$<br>$\chi_{122}=-21.107$<br>$\chi_{133}=-17.299$<br>$\chi_{223}=-20.997$<br>$\chi_{333}=4.104$ | 22.16  |
| Cr <sub>4</sub> Cl <sub>2</sub> (Si <sub>2</sub> O <sub>7</sub> )                 | 82686  | <i>Pc</i>                                       | 1.348 | 0.166    | $\chi_{111}=-10.118$<br>$\chi_{113}=-1.524$<br>$\chi_{122}=-2.905$<br>$\chi_{133}=-1.230$<br>$\chi_{223}=3.578$<br>$\chi_{333}=1.053$      | 10.118 |
| Cs(AlSiO <sub>4</sub> )                                                           | 160822 | <i>Pc2<sub>1</sub>n</i>                         | 4.491 | 0.008    | $\chi_{112}=0.013$<br>$\chi_{222}=-0.023$<br>$\chi_{233}=-0.005$                                                                           | 0.023  |
| Cs(SbO)(Si <sub>2</sub> O <sub>6</sub> )                                          | 66535  | <i>Pna2<sub>1</sub></i>                         | 5.014 | 0.02     | $\chi_{113}=-0.032$<br>$\chi_{223}=0.039$<br>$\chi_{333}=-0.001$                                                                           | 0.039  |
| CsSiB <sub>3</sub> O <sub>7</sub>                                                 | 255774 | <i>Pna2<sub>1</sub></i>                         | 5.428 | 0.044    | $\chi_{113}=-0.760$<br>$\chi_{223}=-2.035$<br>$\chi_{333}=2.228$                                                                           | 2.228  |
| Cs <sub>2</sub> ((Al <sub>2</sub> Si <sub>3</sub> )O <sub>10</sub> )              | 180325 | <i>Fdd2</i>                                     | 4.553 | 0.007    | $\chi_{113}=0.843$<br>$\chi_{223}=-0.458$<br>$\chi_{333}=-0.161$                                                                           | 0.843  |
| Cs <sub>2</sub> SnSi <sub>3</sub> O <sub>9</sub>                                  | 414425 | <i>P2<sub>1</sub>2<sub>1</sub>2<sub>1</sub></i> | 4.762 | 0.005    | $\chi_{123}=0.797$                                                                                                                         | 0.797  |
| Cs <sub>20</sub> (Sn <sub>4</sub> ) <sub>2</sub> (SiO <sub>4</sub> ) <sub>3</sub> | 412509 | <i>Cc</i>                                       | 1.554 | 0.091    | $\chi_{111}=-15.187$<br>$\chi_{113}=5.623$<br>$\chi_{122}=12.937$<br>$\chi_{133}=-6.543$<br>$\chi_{223}=0.201$<br>$\chi_{333}=-17.563$     | 17.563 |
| H <sub>2</sub> SiTi <sub>2</sub> O <sub>7</sub> (H <sub>2</sub> O) <sub>2</sub>   | 173578 | <i>P1</i>                                       | 3.246 | 0.092    | $\chi_{133}=-0.002$<br>$\chi_{222}=0.001$<br>$\chi_{223}=-0.002$<br>$\chi_{333}=-0.002$                                                    | 0.002  |
| K(AlSiO <sub>4</sub> )                                                            | 95367  | <i>P6<sub>3</sub></i>                           | 4.667 | 0        | $\chi_{113}=0.176$<br>$\chi_{223}=0.176$                                                                                                   | 0.331  |

|                                                                      |        |                                                 |       |          |                                                                                                                                                            |        |
|----------------------------------------------------------------------|--------|-------------------------------------------------|-------|----------|------------------------------------------------------------------------------------------------------------------------------------------------------------|--------|
|                                                                      |        |                                                 |       |          | $\chi_{333}=-0.331$                                                                                                                                        |        |
| K(AlSiO <sub>4</sub> )                                               | 162489 | <i>P2<sub>1</sub></i>                           | 4.536 | 0.002    | $\chi_{112}=-0.085$<br>$\chi_{123}=-0.007$<br>$\chi_{222}=-0.284$<br>$\chi_{233}=0.249$                                                                    | 0.284  |
| K(SbO)(SiO <sub>4</sub> )                                            | 69429  | <i>Pna2<sub>1</sub></i>                         | 4.977 | 0.004    | $\chi_{113}=-0.068$<br>$\chi_{223}=-0.103$<br>$\chi_{333}=-0.273$                                                                                          | 0.273  |
| KAl(SiO <sub>4</sub> )                                               | 83449  | <i>P3c</i>                                      | 4.569 | 0.005    | $\chi_{112}=1.231$<br>$\chi_{113}=0.464$<br>$\chi_{222}=-1.231$<br>$\chi_{223}=0.464$<br>$\chi_{333}=-0.828$                                               | 1.231  |
| KAl(SiO <sub>4</sub> )                                               | 34350  | <i>P6<sub>3</sub></i>                           | 4.592 | 0.005    | $\chi_{113}=0.436$<br>$\chi_{223}=0.436$<br>$\chi_{333}=-0.869$                                                                                            | 0.869  |
| KBSi <sub>2</sub> O <sub>6</sub>                                     | 380488 | <i>P2<sub>1</sub>2<sub>1</sub>2<sub>1</sub></i> | 5.313 | 1.00E-03 | $\chi_{123}=-0.584$                                                                                                                                        | 0.584  |
| KLi(Si <sub>2</sub> O <sub>5</sub> )                                 | 82457  | <i>P2<sub>1</sub></i>                           | 4.709 | 0.018    | $\chi_{112}=1.110$<br>$\chi_{123}=-0.142$<br>$\chi_{222}=-0.438$<br>$\chi_{233}=0.536$                                                                     | 1.11   |
| KNa <sub>3</sub> (Al <sub>4</sub> Si <sub>4</sub> O <sub>16</sub> )  | 27596  | <i>P6<sub>3</sub></i>                           | 4.522 | 0.002    | $\chi_{113}=-0.348$<br>$\chi_{223}=-0.347$<br>$\chi_{333}=0.637$                                                                                           | 0.637  |
| KNa <sub>3</sub> (Al <sub>4</sub> Si <sub>4</sub> O <sub>16</sub> )  | 27584  | <i>P6<sub>3</sub></i>                           | 4.521 | 0.002    | $\chi_{113}=0.349$<br>$\chi_{223}=0.349$<br>$\chi_{333}=-0.632$                                                                                            | 0.632  |
| K <sub>2</sub> ((Al <sub>2</sub> Si <sub>3</sub> )O <sub>10</sub> )  | 180323 | <i>Fdd2</i>                                     | 4.424 | 0.006    | $\chi_{113}=0.495$<br>$\chi_{223}=0.007$<br>$\chi_{333}=-0.126$                                                                                            | 0.495  |
| K <sub>2</sub> (NbO) <sub>2</sub> (Si <sub>4</sub> O <sub>12</sub> ) | 72111  | <i>P4bm</i>                                     | 2.926 | 0.125    | $\chi_{113}=12.076$<br>$\chi_{223}=12.075$<br>$\chi_{333}=1.013$                                                                                           | 12.076 |
| K <sub>2</sub> (Si <sub>2</sub> O <sub>5</sub> )                     | 280480 | <i>Cc</i>                                       | 4.137 | 0.011    | $\chi_{111}=0.185$<br>$\chi_{113}=-0.061$<br>$\chi_{122}=0.146$<br>$\chi_{133}=-0.455$<br>$\chi_{223}=-0.004$<br>$\chi_{333}=0.077$                        | 0.455  |
| K <sub>2</sub> (TiSi <sub>3</sub> O <sub>9</sub> )                   | 412920 | <i>R3H</i>                                      | 3.683 | 0.042    | $\chi_{111}=-0.101$<br>$\chi_{112}=-3.471$<br>$\chi_{113}=-0.957$<br>$\chi_{122}=0.101$<br>$\chi_{222}=3.471$<br>$\chi_{223}=-0.956$<br>$\chi_{333}=1.666$ | 3.471  |
| K <sub>2</sub> (ZnSi <sub>2</sub> O <sub>6</sub> )                   | 79705  | <i>C222<sub>1</sub></i>                         | 3.657 | 0.005    | $\chi_{123}=-2.130$                                                                                                                                        | 2.13   |
| K <sub>2</sub> Be <sub>2</sub> Si <sub>6</sub> O <sub>15</sub>       | 60284  | <i>Cmc2<sub>1</sub></i>                         | 4.824 | 0.004    | $\chi_{113}=-0.054$<br>$\chi_{223}=0.340$<br>$\chi_{333}=0.027$                                                                                            | 0.34   |
| K <sub>2</sub> Ca(Si <sub>2</sub> O <sub>5</sub> )(CO <sub>3</sub> ) | 429979 | <i>P6<sub>3</sub>22</i>                         | 3.942 | 0.058    | -                                                                                                                                                          | 0      |
| K <sub>2</sub> Cd(SiO <sub>4</sub> )                                 | 83229  | <i>Pca2<sub>1</sub></i>                         | 2.703 | 0.002    | $\chi_{113}=2.958$<br>$\chi_{223}=-3.256$<br>$\chi_{333}=0.015$                                                                                            | 3.256  |
| K <sub>2</sub> HfSi <sub>3</sub> O <sub>9</sub>                      | 9253   | <i>P-6</i>                                      | 4.634 | 0.03     | $\chi_{111}=0.014$<br>$\chi_{112}=0.004$                                                                                                                   | 0.014  |

|                         |        |              |       |          |                                                                                                                                                            |       |
|-------------------------|--------|--------------|-------|----------|------------------------------------------------------------------------------------------------------------------------------------------------------------|-------|
|                         |        |              |       |          | $\chi_{122}=-0.014$<br>$\chi_{222}=-0.004$                                                                                                                 |       |
| $K_2Mg(SiO_4)$          | 83226  | $Pca2_1$     | 3.741 | 1.00E-03 | $\chi_{113}=-1.150$<br>$\chi_{223}=1.116$<br>$\chi_{333}=-0.221$                                                                                           | 1.15  |
| $K_2Ti(Si_3O_9)$        | 166627 | $P6_3/m$     | 3.504 | 0.068    | -                                                                                                                                                          | 0     |
| $K_2Zn(SiO_4)$          | 83227  | $Pca2_1$     | 3.159 | 0.004    | $\chi_{113}=2.874$<br>$\chi_{223}=-2.933$<br>$\chi_{333}=0.013$                                                                                            | 2.933 |
| $K_2Zn(Si_4O_{10})$     | 68499  | $P2_12_12_1$ | 4.344 | 0.006    | $\chi_{123}=-0.997$                                                                                                                                        | 0.997 |
| $K_2Zn_2(Si_8O_{19})$   | 68904  | $C2$         | 4.086 | 0.02     | $\chi_{112}=-0.851$<br>$\chi_{123}=0.094$<br>$\chi_{222}=2.091$<br>$\chi_{233}=-0.662$                                                                     | 2.091 |
| $K_2Zr(Si_3O_9)$        | 200082 | $P3$         | 4.635 | 0.039    | $\chi_{111}=-0.041$<br>$\chi_{112}=0.034$<br>$\chi_{113}=0.021$<br>$\chi_{122}=0.041$<br>$\chi_{222}=-0.034$<br>$\chi_{223}=0.021$<br>$\chi_{333}=0.187$   | 0.187 |
| $K_2Zr(Si_3O_9)$        | 56898  | $P-6$        | 4.633 | 0.039    | $\chi_{111}=-0.084$<br>$\chi_{112}=0.079$<br>$\chi_{122}=0.084$<br>$\chi_{222}=-0.079$                                                                     | 0.084 |
| $K_3(Nb_3O_6)(Si_2O_7)$ | 79734  | $P-62c$      | 1.884 | 0.323    | $\chi_{112}=-4.939$<br>$\chi_{222}=4.939$                                                                                                                  | 4.939 |
| $K_4(Sn_2Si_6O_{18})$   | 151543 | $R3H$        | 4.715 | 0.005    | $\chi_{111}=-0.221$<br>$\chi_{112}=1.304$<br>$\chi_{113}=-0.504$<br>$\chi_{122}=0.221$<br>$\chi_{222}=-1.304$<br>$\chi_{223}=-0.504$<br>$\chi_{333}=0.539$ | 1.304 |
| $K_4Ba(Si_3O_9)$        | 246254 | $Ama2$       | 4.061 | 0.008    | $\chi_{113}=0.187$<br>$\chi_{123}=0.003$<br>$\chi_{223}=-0.051$<br>$\chi_{333}=-1.538$                                                                     | 1.538 |
| $K_4SrSi_3O_9$          | 245304 | $Ama2$       | 4.028 | 0.007    | $\chi_{113}=0.036$<br>$\chi_{223}=-0.521$<br>$\chi_{333}=-0.415$                                                                                           | 0.521 |
| $K_5In_3Si_7O_{21}$     | 249478 | $Pna2_1$     | 4.281 | 0.009    | $\chi_{113}=1.133$<br>$\chi_{223}=0.192$<br>$\chi_{333}=-1.507$                                                                                            | 1.507 |
| $K_6(Ta_6Si_4O_{26})$   | 15937  | $P-62m$      | 3.224 | 0.136    | $\chi_{112}=0.770$<br>$\chi_{222}=-0.770$                                                                                                                  | 0.770 |
| $Li(AlSiO_4)$           | 66137  | $Pa$         | 5.323 | 0.007    | $\chi_{111}=0.461$<br>$\chi_{113}=0.543$<br>$\chi_{122}=-0.300$<br>$\chi_{133}=0.051$<br>$\chi_{223}=0.242$<br>$\chi_{333}=-0.880$                         | 0.88  |
| $Li(AlSiO_4)$           | 92708  | $R3H$        | 5.475 | 0.008    | $\chi_{111}=-0.036$<br>$\chi_{112}=-0.010$<br>$\chi_{113}=-0.165$<br>$\chi_{122}=0.036$<br>$\chi_{222}=0.010$                                              | 0.268 |

|                                                   |        |                         |       |       |                                                                                                                                                            |       |
|---------------------------------------------------|--------|-------------------------|-------|-------|------------------------------------------------------------------------------------------------------------------------------------------------------------|-------|
|                                                   |        |                         |       |       | $\chi_{223}=-0.165$<br>$\chi_{333}=0.268$                                                                                                                  |       |
| Li(AlSi <sub>4</sub> O <sub>10</sub> )            | 15415  | <i>Pa</i>               | 5.535 | 0.01  | $\chi_{111}=0.018$<br>$\chi_{113}=0.005$<br>$\chi_{133}=-0.025$<br>$\chi_{223}=-0.006$<br>$\chi_{333}=-0.015$                                              | 0.025 |
| Li(AlSi <sub>4</sub> O <sub>10</sub> )            | 64962  | <i>Pa</i>               | 5.529 | 0.009 | $\chi_{111}=0.005$<br>$\chi_{113}=-0.008$<br>$\chi_{122}=0.002$<br>$\chi_{133}=-0.012$<br>$\chi_{223}=-0.005$<br>$\chi_{333}=0.009$                        | 0.012 |
| LiB(SiO <sub>4</sub> )                            | 67536  | <i>I-4</i>              | 6.581 | 0.004 | $\chi_{113}=-0.307$<br>$\chi_{123}=1.650$<br>$\chi_{223}=0.307$                                                                                            | 1.65  |
| LiGa(SiO <sub>4</sub> )                           | 65125  | <i>R3H</i>              | 4.175 | 0.018 | $\chi_{111}=-0.804$<br>$\chi_{112}=0.047$<br>$\chi_{113}=-1.116$<br>$\chi_{122}=0.804$<br>$\chi_{222}=-0.047$<br>$\chi_{223}=-1.116$<br>$\chi_{333}=1.960$ | 1.96  |
| Li <sub>2</sub> (SiO <sub>3</sub> )               | 853    | <i>Cmc2<sub>1</sub></i> | 5.329 | 0.012 | $\chi_{113}=-0.596$<br>$\chi_{223}=0.007$<br>$\chi_{333}=-2.021$                                                                                           | 2.021 |
| Li <sub>2</sub> (SiO <sub>3</sub> )               | 16626  | <i>Cmc2<sub>1</sub></i> | 5.329 | 0.012 | $\chi_{113}=-0.602$<br>$\chi_{223}=0.010$<br>$\chi_{333}=-2.018$                                                                                           | 2.018 |
| Li <sub>2</sub> (Si <sub>2</sub> O <sub>5</sub> ) | 78562  | <i>Ccc2</i>             | 5.304 | 0.002 | $\chi_{113}=-0.547$<br>$\chi_{223}=-0.781$<br>$\chi_{333}=-0.681$                                                                                          | 0.781 |
| Li <sub>2</sub> (Si <sub>2</sub> O <sub>5</sub> ) | 280481 | <i>Ccc2</i>             | 5.301 | 0.003 | $\chi_{113}=0.543$<br>$\chi_{223}=0.768$<br>$\chi_{333}=0.678$                                                                                             | 0.768 |
| Li <sub>2</sub> (Si <sub>2</sub> O <sub>5</sub> ) | 15414  | <i>Cc</i>               | 5.3   | 0.002 | $\chi_{111}=-0.005$<br>$\chi_{113}=0.541$<br>$\chi_{133}=-0.002$<br>$\chi_{223}=0.765$<br>$\chi_{333}=0.672$                                               | 0.765 |
| Li <sub>2</sub> Ba(SiO <sub>4</sub> )             | 180289 | <i>P6<sub>3</sub>cm</i> | 4.441 | 0     | $\chi_{113}=-0.545$<br>$\chi_{223}=-0.545$<br>$\chi_{333}=7.405$                                                                                           | 7.405 |
| Li <sub>2</sub> Be(SiO <sub>4</sub> )             | 28307  | <i>Pn</i>               | 6.205 | 0.011 | $\chi_{111}=-0.726$<br>$\chi_{113}=0.600$<br>$\chi_{122}=-0.183$<br>$\chi_{133}=-0.242$<br>$\chi_{223}=-0.487$<br>$\chi_{333}=-0.109$                      | 0.726 |
| Li <sub>2</sub> Be(SiO <sub>4</sub> )             | 193838 | <i>Pn</i>               | 6.205 | 0.011 | $\chi_{111}=-0.718$<br>$\chi_{113}=0.603$<br>$\chi_{122}=-0.185$<br>$\chi_{133}=-0.241$<br>$\chi_{223}=-0.488$<br>$\chi_{333}=-0.109$                      | 0.718 |
| Li <sub>2</sub> BeSiO <sub>4</sub>                | 2319   | <i>C222<sub>1</sub></i> | 5.885 | 0.017 | $\chi_{123}=0.511$                                                                                                                                         | 0.511 |
| Li <sub>2</sub> CaSiO <sub>4</sub>                | 19023  | <i>I-42m</i>            | 5.429 | 0.015 | $\chi_{123}=1.600$                                                                                                                                         | 1.6   |

|                                                                   |        |                          |       |          |                                                                                                                                                            |       |
|-------------------------------------------------------------------|--------|--------------------------|-------|----------|------------------------------------------------------------------------------------------------------------------------------------------------------------|-------|
| Li <sub>2</sub> SiO <sub>3</sub>                                  | 100402 | <i>Cmc2<sub>1</sub></i>  | 5.331 | 0.012    | $\chi_{113}=-0.593$<br>$\chi_{223}=0.006$<br>$\chi_{333}=-2.019$                                                                                           | 2.019 |
| Li <sub>2</sub> SiO <sub>3</sub>                                  | 28192  | <i>Cmc2<sub>1</sub></i>  | 5.326 | 0.011    | $\chi_{113}=-0.594$<br>$\chi_{223}=0.010$<br>$\chi_{333}=-2.011$                                                                                           | 2.011 |
| Li <sub>3</sub> (GaSiO <sub>5</sub> )                             | 72100  | <i>P2<sub>1</sub>nb</i>  | 3.765 | 0.012    | $\chi_{111}=0.455$<br>$\chi_{122}=1.608$<br>$\chi_{133}=0.886$                                                                                             | 1.608 |
| Li <sub>3</sub> AlSiO <sub>5</sub>                                | 252215 | <i>Pna2<sub>1</sub></i>  | 5.154 | 0.007    | $\chi_{113}=0.026$<br>$\chi_{223}=0.363$<br>$\chi_{333}=-2.063$                                                                                            | 2.063 |
| Li <sub>4</sub> (B <sub>4</sub> Si <sub>8</sub> O <sub>24</sub> ) | 90849  | <i>P2<sub>1</sub></i>    | 5.803 | 0.009    | $\chi_{112}=-0.007$<br>$\chi_{222}=-0.001$<br>$\chi_{233}=-0.006$                                                                                          | 0.007 |
| Li <sub>6</sub> (Si <sub>2</sub> O <sub>7</sub> )                 | 25752  | <i>P-42<sub>1</sub>m</i> | 4.997 | 0.003    | $\chi_{123}=-0.133$                                                                                                                                        | 0.133 |
| Li <sub>8</sub> O <sub>2</sub> (SiO <sub>4</sub> )                | 65176  | <i>P6<sub>3</sub>cm</i>  | 4.662 | 1.00E-02 | $\chi_{113}=-0.873$<br>$\chi_{223}=-0.873$<br>$\chi_{333}=3.340$                                                                                           | 3.34  |
| MgNa <sub>2</sub> (SiO <sub>4</sub> )                             | 15619  | <i>Pn</i>                | 3.73  | 0.006    | $\chi_{111}=0.195$<br>$\chi_{113}=-0.409$<br>$\chi_{122}=-0.462$<br>$\chi_{133}=0.400$<br>$\chi_{223}=-0.229$<br>$\chi_{333}=0.431$                        | 0.462 |
| Mg <sub>2</sub> (SiO <sub>4</sub> )                               | 189973 | <i>Cmc2<sub>1</sub></i>  | 4.414 | 0.033    | $\chi_{113}=-0.432$<br>$\chi_{223}=-0.161$<br>$\chi_{333}=-0.263$                                                                                          | 0.432 |
| Na(AlSiO <sub>4</sub> )                                           | 73511  | <i>Pb2<sub>1</sub>a</i>  | 4.769 | 0        | $\chi_{112}=-0.671$<br>$\chi_{222}=0.004$<br>$\chi_{233}=0.666$                                                                                            | 0.671 |
| Na(AlSiO <sub>4</sub> )                                           | 191581 | <i>P6<sub>3</sub></i>    | 4.377 | 0.003    | $\chi_{113}=-0.331$<br>$\chi_{223}=-0.331$<br>$\chi_{333}=0.612$                                                                                           | 0.612 |
| Na(AlSiO <sub>4</sub> )                                           | 85553  | <i>P6<sub>1</sub></i>    | 4.62  | 0.004    | $\chi_{113}=-0.305$<br>$\chi_{223}=-0.305$<br>$\chi_{333}=0.574$                                                                                           | 0.574 |
| Na(GaSiO <sub>4</sub> )                                           | 411328 | <i>P6<sub>3</sub></i>    | 3.932 | 0.026    | $\chi_{113}=0.167$<br>$\chi_{223}=0.167$<br>$\chi_{333}=-1.987$                                                                                            | 1.987 |
| Na(SbO)(SiO <sub>4</sub> )                                        | 66354  | <i>Pna2<sub>1</sub></i>  | 4.73  | 0.004    | $\chi_{113}=-0.048$<br>$\chi_{223}=-0.119$<br>$\chi_{333}=-0.102$                                                                                          | 0.119 |
| NaAl(SiO <sub>4</sub> )                                           | 36324  | <i>P6<sub>3</sub></i>    | 4.397 | 0.003    | $\chi_{113}=-0.327$<br>$\chi_{223}=-0.327$<br>$\chi_{333}=0.610$                                                                                           | 0.61  |
| NaAlSiO <sub>4</sub>                                              | 433181 | <i>P3<sub>2</sub></i>    | 4.88  | 0.006    | $\chi_{111}=0.588$<br>$\chi_{112}=-0.549$<br>$\chi_{113}=-0.312$<br>$\chi_{122}=-0.588$<br>$\chi_{222}=0.549$<br>$\chi_{223}=-0.312$<br>$\chi_{333}=0.681$ | 0.681 |
| NaAlSiO <sub>4</sub>                                              | 8646   | <i>P6<sub>3</sub></i>    | 4.392 | 0.003    | $\chi_{113}=-0.331$<br>$\chi_{223}=-0.331$<br>$\chi_{333}=0.616$                                                                                           | 0.616 |

|                                                     |        |                         |       |          |                                                                                         |        |
|-----------------------------------------------------|--------|-------------------------|-------|----------|-----------------------------------------------------------------------------------------|--------|
| NaAlSiO <sub>4</sub>                                | 259567 | <i>P6<sub>3</sub></i>   | 4.392 | 0.003    | $\chi_{113}=-0.332$<br>$\chi_{223}=-0.332$<br>$\chi_{333}=0.615$                        | 0.615  |
| NaB(SiO <sub>4</sub> )                              | 92822  | <i>P6<sub>3</sub></i>   | 5.534 | 0.006    | $\chi_{113}=-0.081$<br>$\chi_{223}=-0.081$<br>$\chi_{333}=-0.058$                       | 0.081  |
| NaBSiO <sub>4</sub>                                 | 39459  | <i>P6<sub>3</sub></i>   | 5.546 | 0.008    | $\chi_{113}=0.239$<br>$\chi_{223}=0.239$<br>$\chi_{333}=0.170$                          | 0.239  |
| NaCa <sub>3</sub> PSiO <sub>8</sub>                 | 254593 | <i>Pna2<sub>1</sub></i> | 4.313 | 0.005    | $\chi_{113}=-0.424$<br>$\chi_{223}=-0.280$<br>$\chi_{333}=-1.377$                       | 1.377  |
| NaCs(Si <sub>2</sub> O <sub>5</sub> )               | 92535  | <i>Pna2<sub>1</sub></i> | 4.666 | 0.006    | $\chi_{113}=-0.007$<br>$\chi_{223}=0.009$<br>$\chi_{333}=-0.022$                        | 0.022  |
| NaY(SiO <sub>4</sub> )                              | 30384  | <i>Pbn2<sub>1</sub></i> | 4.554 | 0.043    | $\chi_{113}=0.001$<br>$\chi_{223}=0.001$<br>$\chi_{333}=0.022$                          | 0.022  |
| NaYSiO <sub>4</sub>                                 | 20161  | <i>Pc2<sub>1</sub>n</i> | 4.555 | 0.043    | $\chi_{112}=0.006$<br>$\chi_{222}=-0.007$<br>$\chi_{233}=-0.006$                        | 0.007  |
| Na <sub>2</sub> (MgSiO <sub>4</sub> )               | 84562  | <i>Pna2<sub>1</sub></i> | 3.724 | 0.005    | $\chi_{113}=-0.361$<br>$\chi_{223}=0.361$<br>$\chi_{333}=0.269$                         | 0.361  |
| Na <sub>2</sub> (MgSiO <sub>4</sub> )               | 84563  | <i>Pna2<sub>1</sub></i> | 3.724 | 0.005    | $\chi_{113}=0.360$<br>$\chi_{223}=-0.361$<br>$\chi_{333}=-0.269$                        | 0.361  |
| Na <sub>2</sub> (SiO <sub>3</sub> )                 | 15388  | <i>Cmc2<sub>1</sub></i> | 3.861 | 0.013    | $\chi_{113}=-0.407$<br>$\chi_{223}=-0.479$<br>$\chi_{333}=0.363$                        | 0.479  |
| Na <sub>2</sub> (Si <sub>2</sub> O <sub>5</sub> )   | 80378  | <i>Pbc2<sub>1</sub></i> | 4.347 | 0.023    | $\chi_{113}=-0.341$<br>$\chi_{223}=-0.239$<br>$\chi_{333}=-0.326$                       | 0.341  |
| Na <sub>2</sub> (Si <sub>2</sub> O <sub>5</sub> )   | 98564  | <i>Pn2<sub>1</sub>a</i> | 4.539 | 0.021    | $\chi_{112}=-0.024$<br>$\chi_{222}=0.103$<br>$\chi_{233}=0.109$                         | 0.109  |
| Na <sub>2</sub> (TiSiO <sub>5</sub> )               | 82153  | <i>Pmc2<sub>1</sub></i> | 3.482 | 0.026    | $\chi_{111}=0.001$<br>$\chi_{113}=-4.248$<br>$\chi_{223}=-0.564$<br>$\chi_{333}=11.670$ | 11.670 |
| Na <sub>2</sub> (ZnSiO <sub>4</sub> )               | 83312  | <i>Pna2<sub>1</sub></i> | 3.021 | 0.014    | $\chi_{113}=3.880$<br>$\chi_{223}=-3.099$<br>$\chi_{333}=0.311$                         | 3.88   |
| Na <sub>2</sub> (ZnSi <sub>3</sub> O <sub>8</sub> ) | 924    | <i>P2<sub>1</sub></i>   | 4.03  | 0.009    | $\chi_{112}=-0.638$<br>$\chi_{123}=0.143$<br>$\chi_{222}=1.085$<br>$\chi_{233}=-0.732$  | 1.085  |
| Na <sub>2</sub> BaSi <sub>2</sub> O <sub>6</sub>    | 10217  | <i>P2<sub>1</sub></i>   | 4.183 | 0.027    | $\chi_{112}=-0.256$<br>$\chi_{123}=-0.003$<br>$\chi_{222}=0.137$<br>$\chi_{233}=-0.930$ | 0.93   |
| Na <sub>2</sub> Be(SiO <sub>4</sub> )               | 69009  | <i>Pca2<sub>1</sub></i> | 4.688 | 1.00E-03 | $\chi_{113}=0.708$<br>$\chi_{223}=-0.714$<br>$\chi_{333}=0.102$                         | 0.714  |
| Na <sub>2</sub> Be(SiO <sub>4</sub> )               | 202719 | <i>Pca2<sub>1</sub></i> | 4.693 | 0.002    | $\chi_{113}=0.703$<br>$\chi_{223}=-0.710$<br>$\chi_{333}=0.104$                         | 0.71   |

|                                                                 |        |                                                 |       |          |                                                                                                                                     |        |
|-----------------------------------------------------------------|--------|-------------------------------------------------|-------|----------|-------------------------------------------------------------------------------------------------------------------------------------|--------|
| Na <sub>2</sub> Be(SiO <sub>4</sub> )                           | 69010  | <i>Pca2<sub>1</sub></i>                         | 4.688 | 1.00E-03 | $\chi_{113}=0.700$<br>$\chi_{223}=-0.707$<br>$\chi_{333}=0.115$                                                                     | 0.707  |
| Na <sub>2</sub> Be(SiO <sub>4</sub> )                           | 203149 | <i>Pca2<sub>1</sub></i>                         | 3.016 | 0.018    | $\chi_{113}=0.324$<br>$\chi_{223}=0.207$<br>$\chi_{333}=-0.266$                                                                     | 0.324  |
| Na <sub>2</sub> Mg(SiO <sub>4</sub> )                           | 15618  | <i>Pn</i>                                       | 3.73  | 0.006    | $\chi_{111}=0.197$<br>$\chi_{113}=-0.415$<br>$\chi_{122}=-0.460$<br>$\chi_{133}=0.398$<br>$\chi_{223}=-0.237$<br>$\chi_{333}=0.423$ | 0.46   |
| Na <sub>2</sub> Si(S <sub>2</sub> O <sub>7</sub> ) <sub>3</sub> | 422034 | <i>P2<sub>1</sub>2<sub>1</sub>2<sub>1</sub></i> | 5.547 | 0.013    | $\chi_{123}=-0.167$                                                                                                                 | 0.167  |
| Na <sub>2</sub> SiO <sub>3</sub>                                | 24664  | <i>Cmc2<sub>1</sub></i>                         | 3.863 | 0.013    | $\chi_{113}=-0.421$<br>$\chi_{223}=-0.478$<br>$\chi_{333}=0.336$                                                                    | 0.478  |
| Na <sub>2</sub> TiSiO <sub>5</sub>                              | 259048 | <i>Pmc2<sub>1</sub></i>                         | 3.48  | 0.026    | $\chi_{113}=-4.512$<br>$\chi_{223}=-0.607$<br>$\chi_{333}=11.660$                                                                   | 11.660 |
| Na <sub>2</sub> Zn(SiO <sub>4</sub> )                           | 27735  | <i>Pn</i>                                       | 3.079 | 0.014    | $\chi_{111}=4.924$<br>$\chi_{112}=-3.092$<br>$\chi_{122}=-2.351$<br>$\chi_{133}=-2.613$<br>$\chi_{222}=0.266$<br>$\chi_{233}=3.476$ | 4.924  |
| Na <sub>2</sub> Zn(SiO <sub>4</sub> )                           | 18314  | <i>Pn</i>                                       | 3.08  | 0.013    | $\chi_{111}=0.221$<br>$\chi_{113}=-2.375$<br>$\chi_{122}=3.449$<br>$\chi_{133}=-3.045$<br>$\chi_{223}=-2.587$<br>$\chi_{333}=4.903$ | 4.903  |
| Na <sub>2</sub> Zn(SiO <sub>4</sub> )                           | 34565  | <i>Pn</i>                                       | 3.076 | 0.015    | $\chi_{111}=4.886$<br>$\chi_{112}=-3.007$<br>$\chi_{122}=-2.331$<br>$\chi_{133}=-2.620$<br>$\chi_{222}=0.270$<br>$\chi_{233}=3.463$ | 4.886  |
| Na <sub>2</sub> Zn(SiO <sub>4</sub> )                           | 34068  | <i>Pn</i>                                       | 3.078 | 0.014    | $\chi_{111}=0.233$<br>$\chi_{113}=-2.367$<br>$\chi_{122}=3.517$<br>$\chi_{133}=-3.052$<br>$\chi_{223}=-2.579$<br>$\chi_{333}=4.853$ | 4.853  |
| Na <sub>2</sub> Zn(Si <sub>2</sub> O <sub>6</sub> )             | 20837  | <i>Fdd2</i>                                     | 3.656 | 0.01     | $\chi_{113}=2.208$<br>$\chi_{223}=-3.125$<br>$\chi_{333}=-0.462$                                                                    | 3.125  |
| Na <sub>2</sub> Zn(Si <sub>2</sub> O <sub>6</sub> )             | 16160  | <i>Fdd2</i>                                     | 3.631 | 0.009    | $\chi_{113}=2.121$<br>$\chi_{223}=-3.080$<br>$\chi_{333}=-0.370$                                                                    | 3.08   |
| Na <sub>2</sub> Zn(Si <sub>3</sub> O <sub>8</sub> )             | 20114  | <i>P2<sub>1</sub></i>                           | 4.027 | 0.009    | $\chi_{113}=0.641$<br>$\chi_{123}=-0.140$<br>$\chi_{223}=0.737$<br>$\chi_{333}=-1.091$                                              | 1.091  |
| Na <sub>2</sub> Zn(Si <sub>3</sub> O <sub>8</sub> )             | 200440 | <i>P2<sub>1</sub></i>                           | 4.027 | 0.009    | $\chi_{113}=0.651$<br>$\chi_{123}=-0.136$<br>$\chi_{223}=0.729$<br>$\chi_{333}=-1.071$                                              | 1.071  |



|                                                                          |        |                   |       |          |                                                                                                                                                                                                                                 |       |
|--------------------------------------------------------------------------|--------|-------------------|-------|----------|---------------------------------------------------------------------------------------------------------------------------------------------------------------------------------------------------------------------------------|-------|
| $\text{Na}_2\text{Zn}_2(\text{Si}_2\text{O}_7)$                          | 20477  | <i>C2cm</i>       | 3.289 | 0.05     | $\chi_{111}=-5.402$<br>$\chi_{122}=5.218$<br>$\chi_{133}=0.443$                                                                                                                                                                 | 5.402 |
| $\text{Na}_2\text{Zn}_2(\text{Si}_2\text{O}_7)$                          | 34325  | <i>C2cm</i>       | 3.286 | 0.049    | $\chi_{111}=-5.395$<br>$\chi_{122}=5.199$<br>$\chi_{133}=0.407$                                                                                                                                                                 | 5.395 |
| $\text{Na}_2\text{Zn}_3(\text{SiO}_4)_2$                                 | 4339   | <i>P1</i>         | 2.667 | 0.027    | $\chi_{111}=-1.245$<br>$\chi_{112}=-0.811$<br>$\chi_{113}=-0.075$<br>$\chi_{122}=1.242$<br>$\chi_{123}=-0.302$<br>$\chi_{133}=-0.042$<br>$\chi_{222}=0.112$<br>$\chi_{223}=-0.154$<br>$\chi_{233}=0.394$<br>$\chi_{333}=-0.313$ | 1.245 |
| $\text{Na}_3(\text{Si}_2\text{PO}_8)$                                    | 161804 | <i>P2_12_12_1</i> | 3.608 | 0.008    | $\chi_{123}=0.103$                                                                                                                                                                                                              | 0.103 |
| $\text{Na}_3\text{AlBeSi}_2\text{O}_8$                                   | 4334   | <i>P2_12_12</i>   | 4.561 | 0.003    | $\chi_{123}=-0.372$                                                                                                                                                                                                             | 0.372 |
| $\text{Na}_3\text{AlBeSi}_2\text{O}_8$                                   | 20495  | <i>P2_12_12</i>   | 4.561 | 0.003    | $\chi_{123}=-0.372$                                                                                                                                                                                                             | 0.372 |
| $\text{Na}_3\text{YSi}_3\text{O}_9$                                      | 20774  | <i>P2_12_12_1</i> | 4.463 | 0        | $\chi_{123}=-0.032$                                                                                                                                                                                                             | 0.032 |
| $\text{Na}_4\text{Sc}_2(\text{Si}_4\text{O}_{13})$                       | 200808 | <i>Pna2_1</i>     | 4.679 | 0.028    | $\chi_{113}=0.092$<br>$\chi_{223}=-0.343$<br>$\chi_{333}=0.128$                                                                                                                                                                 | 0.343 |
| $\text{Na}_4\text{Sr}(\text{SiO}_3)_3$                                   | 33943  | <i>C2</i>         | 4.084 | 0.005    | $\chi_{112}=0.247$<br>$\chi_{123}=0.297$<br>$\chi_{222}=-0.908$<br>$\chi_{233}=0.578$                                                                                                                                           | 0.908 |
| $\text{Na}_4\text{Zr}_2(\text{SiO}_4)_3$                                 | 20340  | <i>R3cR</i>       | 4.338 | 0.032    | $\chi_{111}=0.137$<br>$\chi_{113}=-0.069$<br>$\chi_{122}=-0.137$<br>$\chi_{223}=-0.069$<br>$\chi_{333}=-0.128$                                                                                                                  | 0.137 |
| $\text{Na}_6\text{Be}_3(\text{Si}_6\text{O}_{18})$                       | 34075  | <i>Fdd2</i>       | 4.845 | 0.002    | $\chi_{113}=-0.424$<br>$\chi_{223}=0.479$<br>$\chi_{333}=0.054$                                                                                                                                                                 | 0.479 |
| $\text{Na}_6\text{Cd}_3(\text{Si}_6\text{O}_{18})$                       | 20475  | <i>Pm2_1n</i>     | 3.244 | 1.30E-02 | $\chi_{112}=-0.532$<br>$\chi_{222}=0.945$<br>$\chi_{233}=0.672$                                                                                                                                                                 | 0.945 |
| $\text{Na}_8(\text{AlBeSi}_4\text{O}_{12})_2\text{Cl}_2$                 | 69958  | <i>I-4</i>        | 4.715 | 0.014    | $\chi_{113}=-0.103$<br>$\chi_{123}=0.944$<br>$\chi_{223}=0.103$                                                                                                                                                                 | 0.944 |
| $\text{Na}_8(\text{Be}_2\text{Al}_2\text{Si}_8\text{O}_{24})\text{Cl}_2$ | 34665  | <i>I-4</i>        | 4.723 | 0.014    | $\chi_{113}=-0.103$<br>$\chi_{123}=0.939$<br>$\chi_{223}=0.103$                                                                                                                                                                 | 0.939 |
| $\text{NbCa}_7(\text{Si}_2\text{O}_7)_2\text{O}_3\text{F}$               | 31269  | <i>Pa</i>         | 3.124 | 0.047    | $\chi_{111}=3.219$<br>$\chi_{113}=3.158$<br>$\chi_{122}=1.082$<br>$\chi_{133}=-2.245$<br>$\chi_{223}=0.068$<br>$\chi_{333}=-4.164$                                                                                              | 4.164 |
| $\text{Nb}_2\text{Ca}_{14}(\text{Si}_2\text{O}_7)_4\text{O}_6\text{F}_2$ | 158915 | <i>Pa</i>         | 3.121 | 0.047    | $\chi_{111}=3.185$<br>$\chi_{113}=3.161$<br>$\chi_{122}=1.082$<br>$\chi_{133}=-2.246$<br>$\chi_{223}=0.080$<br>$\chi_{333}=-4.146$                                                                                              | 4.146 |

|                                                                                                         |        |                                                 |       |          |                                                                                                                                                                                                         |       |
|---------------------------------------------------------------------------------------------------------|--------|-------------------------------------------------|-------|----------|---------------------------------------------------------------------------------------------------------------------------------------------------------------------------------------------------------|-------|
| PbZn(SiO <sub>4</sub> )                                                                                 | 26840  | <i>Pna2<sub>1</sub></i>                         | 3.263 | 0.033    | $\chi_{113}=-4.954$<br>$\chi_{223}=-3.024$<br>$\chi_{333}=15.160$                                                                                                                                       | 15.16 |
| Pb <sub>2</sub> In <sub>2</sub> Si <sub>2</sub> O <sub>9</sub>                                          | 40857  | <i>Pna2<sub>1</sub></i>                         | 3.223 | 0.02     | $\chi_{113}=5.923$<br>$\chi_{223}=3.693$<br>$\chi_{333}=2.454$                                                                                                                                          | 5.923 |
| Pb <sub>2</sub> In <sub>2</sub> Si <sub>2</sub> O <sub>9</sub>                                          | 407263 | <i>Pna2<sub>1</sub></i>                         | 3.231 | 0.021    | $\chi_{113}=5.787$<br>$\chi_{223}=3.770$<br>$\chi_{333}=2.357$                                                                                                                                          | 5.787 |
| Pb <sub>4</sub> Zn <sub>2</sub> ((SO <sub>4</sub> )(SiO <sub>4</sub> (Si <sub>2</sub> O <sub>7</sub> )) | 100296 | <i>P2<sub>1</sub></i>                           | 3.571 | 0.011    | $\chi_{112}=-0.361$<br>$\chi_{123}=1.143$<br>$\chi_{222}=-11.660$<br>$\chi_{233}=1.570$                                                                                                                 | 11.66 |
| Rb(AlSiO <sub>4</sub> )                                                                                 | 4335   | <i>Pc2<sub>1</sub>n</i>                         | 4.335 | 0.008    | $\chi_{112}=-1.110$<br>$\chi_{222}=0.967$<br>$\chi_{233}=0.045$                                                                                                                                         | 1.11  |
| Rb(AlSiO <sub>4</sub> )                                                                                 | 160823 | <i>Pc2<sub>1</sub>n</i>                         | 4.335 | 0.009    | $\chi_{112}=1.080$<br>$\chi_{222}=-0.967$<br>$\chi_{233}=-0.078$                                                                                                                                        | 1.08  |
| RbNb(SiO <sub>3</sub> )O <sub>2</sub>                                                                   | 39594  | <i>P2<sub>1</sub>2<sub>1</sub>2<sub>1</sub></i> | 2.81  | 0.023    | $\chi_{123}=0.281$                                                                                                                                                                                      | 0.281 |
| Rb <sub>2</sub> ((Al <sub>2</sub> Si <sub>3</sub> )O <sub>10</sub> )                                    | 180324 | <i>Fdd2</i>                                     | 4.512 | 0.004    | $\chi_{113}=0.742$<br>$\chi_{223}=-0.200$<br>$\chi_{333}=0.110$                                                                                                                                         | 0.742 |
| Rb <sub>2</sub> (Be <sub>2</sub> Si <sub>2</sub> O <sub>7</sub> )                                       | 828    | <i>P2nn</i>                                     | 4.382 | 0.005    | $\chi_{111}=0.109$<br>$\chi_{122}=0.486$<br>$\chi_{133}=-0.337$                                                                                                                                         | 0.486 |
| Rb <sub>2</sub> Ca <sub>2</sub> Si <sub>3</sub> O <sub>9</sub>                                          | 430223 | <i>Pn</i>                                       | 4.247 | 0.009    | $\chi_{111}=-0.208$<br>$\chi_{113}=0.321$<br>$\chi_{122}=0.164$<br>$\chi_{133}=-0.190$<br>$\chi_{223}=-2.201$<br>$\chi_{333}=1.141$                                                                     | 2.201 |
| Rb <sub>2</sub> Cd(SiO <sub>4</sub> )                                                                   | 93879  | <i>C222<sub>1</sub></i>                         | 2.851 | 0.016    | $\chi_{123}=-0.014$                                                                                                                                                                                     | 0.014 |
| Rb <sub>6</sub> (Si <sub>10</sub> O <sub>23</sub> )                                                     | 250378 | <i>Cm2m</i>                                     | 4.273 | 0.013    | $\chi_{112}=-1.583$<br>$\chi_{222}=2.443$<br>$\chi_{233}=-0.755$                                                                                                                                        | 2.443 |
| Rb <sub>6</sub> Si <sub>10</sub> O <sub>23</sub>                                                        | 14023  | <i>C2mm</i>                                     | 4.366 | 0.012    | $\chi_{111}=1.132$<br>$\chi_{122}=-2.030$<br>$\chi_{133}=0.895$                                                                                                                                         | 2.03  |
| Si(P <sub>2</sub> O <sub>7</sub> )                                                                      | 75116  | <i>P6<sub>3</sub></i>                           | 5.913 | 0.015    | $\chi_{113}=-0.001$<br>$\chi_{223}=-0.001$<br>$\chi_{333}=-0.005$                                                                                                                                       | 0.005 |
| SiO <sub>2</sub>                                                                                        | 413210 | <i>Cc</i>                                       | 5.669 | 0.006    | $\chi_{111}=-1.746$<br>$\chi_{113}=-0.340$<br>$\chi_{122}=1.112$<br>$\chi_{133}=0.886$<br>$\chi_{223}=0.393$<br>$\chi_{333}=0.040$                                                                      | 1.746 |
| SiO <sub>2</sub>                                                                                        | 81382  | <i>C1</i>                                       | 5.77  | 1.00E-03 | $\chi_{111}=-1.458$<br>$\chi_{113}=-0.236$<br>$\chi_{122}=1.244$<br>$\chi_{123}=0.001$<br>$\chi_{133}=0.190$<br>$\chi_{222}=-0.002$<br>$\chi_{223}=0.188$<br>$\chi_{233}=-0.003$<br>$\chi_{333}=-0.025$ | 1.458 |

|                                                                      |        |                                                       |       |          |                                                                                                                                      |       |
|----------------------------------------------------------------------|--------|-------------------------------------------------------|-------|----------|--------------------------------------------------------------------------------------------------------------------------------------|-------|
| SiO <sub>2</sub>                                                     | 27745  | <i>P</i> 3 <sub>1</sub> 21                            | 5.831 | 3.00E-03 | $\chi_{112}=1.086$<br>$\chi_{222}=-1.086$                                                                                            | 1.086 |
| SiO <sub>2</sub>                                                     | 62405  | <i>P</i> 3 <sub>2</sub> 21                            | 5.828 | 2.00E-03 | $\chi_{112}=-1.061$<br>$\chi_{222}=1.061$                                                                                            | 1.061 |
| SiO <sub>2</sub>                                                     | 67121  | <i>P</i> 3 <sub>1</sub> 21                            | 5.825 | 0.003    | $\chi_{112}=-1.048$<br>$\chi_{222}=1.048$                                                                                            | 1.048 |
| SiO <sub>2</sub>                                                     | 41414  | <i>P</i> 3 <sub>1</sub> 21                            | 5.823 | 0.002    | $\chi_{112}=-1.038$<br>$\chi_{222}=1.038$                                                                                            | 1.038 |
| SiO <sub>2</sub>                                                     | 69114  | <i>Cmc</i> 2 <sub>1</sub>                             | 5.737 | 4.00E-03 | $\chi_{113}=0.021$<br>$\chi_{223}=0.671$<br>$\chi_{333}=-0.548$                                                                      | 0.671 |
| SiO <sub>2</sub>                                                     | 34867  | <i>Cc</i>                                             | 5.643 | 0.004    | $\chi_{111}=0.294$<br>$\chi_{113}=0.081$<br>$\chi_{122}=-0.084$<br>$\chi_{133}=-0.216$<br>$\chi_{223}=-0.040$<br>$\chi_{333}=-0.093$ | 0.294 |
| SiO <sub>2</sub>                                                     | 408281 | <i>Cc</i>                                             | 5.634 | 0.003    | $\chi_{111}=0.253$<br>$\chi_{113}=-0.080$<br>$\chi_{122}=-0.083$<br>$\chi_{133}=-0.172$<br>$\chi_{223}=0.025$<br>$\chi_{333}=0.111$  | 0.253 |
| SiO <sub>2</sub>                                                     | 153471 | <i>Aa</i>                                             | 5.628 | 0.003    | $\chi_{111}=-0.183$<br>$\chi_{113}=-0.082$<br>$\chi_{122}=-0.059$<br>$\chi_{133}=0.203$<br>$\chi_{223}=0.061$<br>$\chi_{333}=0.006$  | 0.203 |
| SiO <sub>2</sub>                                                     | 52371  | <i>P</i> 2 <sub>1</sub> 2 <sub>1</sub> 2 <sub>1</sub> | 5.869 | 0.004    | $\chi_{123}=-0.021$                                                                                                                  | 0.021 |
| SiO <sub>2</sub>                                                     | 171674 | <i>Amm</i> 2                                          | 5.732 | 1.00E-03 | $\chi_{113}=-0.015$<br>$\chi_{223}=0.014$<br>$\chi_{333}=0.012$                                                                      | 0.015 |
| SiO <sub>2</sub>                                                     | 47220  | <i>P</i> 4 <sub>1</sub> 2 <sub>1</sub> 2              | 5.654 | 0.006    | -                                                                                                                                    | 0     |
| SiO <sub>2</sub>                                                     | 29343  | <i>P</i> 6 <sub>3</sub> 22                            | 5.599 | 0.002    | -                                                                                                                                    | 0     |
| Si <sub>32</sub> O <sub>64</sub>                                     | 280624 | <i>C</i> 222                                          | 5.882 | 0.002    | $\chi_{123}=-0.024$                                                                                                                  | 0.024 |
| Si <sub>6</sub> O <sub>12</sub>                                      | 162441 | <i>Cmc</i> 2 <sub>1</sub>                             | 5.735 | 0.004    | $\chi_{113}=-0.031$<br>$\chi_{223}=-0.634$<br>$\chi_{333}=0.543$                                                                     | 0.634 |
| SrNa <sub>2</sub> (AlSiO <sub>4</sub> ) <sub>4</sub>                 | 156656 | <i>lba</i> 2                                          | 4.923 | 0.007    | $\chi_{113}=0.206$<br>$\chi_{223}=0.468$<br>$\chi_{333}=-0.602$                                                                      | 0.602 |
| SrSiAl <sub>2</sub> N <sub>2</sub> O <sub>3</sub>                    | 408170 | <i>P</i> 2 <sub>1</sub> 2 <sub>1</sub> 2 <sub>1</sub> | 4.173 | 1.50E-02 | $\chi_{123}=-2.357$                                                                                                                  | 2.357 |
| Sr <sub>2</sub> Mg(Si <sub>2</sub> O <sub>7</sub> )                  | 261226 | <i>P</i> -42 <sub>1</sub> <i>m</i>                    | 4.771 | 0.016    | $\chi_{123}=-0.229$                                                                                                                  | 0.229 |
| Sr <sub>2</sub> Mg(Si <sub>2</sub> O <sub>7</sub> )                  | 155300 | <i>P</i> -42 <sub>1</sub> <i>m</i>                    | 4.772 | 0.016    | $\chi_{123}=-0.225$                                                                                                                  | 0.225 |
| Sr <sub>2</sub> Mg(Si <sub>2</sub> O <sub>7</sub> )                  | 183978 | <i>P</i> -42 <sub>1</sub> <i>m</i>                    | 4.771 | 0.016    | $\chi_{123}=-0.224$                                                                                                                  | 0.224 |
| Sr <sub>2</sub> Mg(Si <sub>2</sub> O <sub>7</sub> )                  | 31308  | <i>P</i> -42 <sub>1</sub> <i>m</i>                    | 4.772 | 0.016    | $\chi_{123}=-0.216$                                                                                                                  | 0.216 |
| Sr <sub>2</sub> MgSi <sub>2</sub> O <sub>7</sub>                     | 230649 | <i>P</i> -42 <sub>1</sub> <i>m</i>                    | 4.769 | 0.016    | $\chi_{123}=-0.218$                                                                                                                  | 0.218 |
| Sr <sub>2</sub> Zn(Si <sub>2</sub> O <sub>7</sub> )                  | 247476 | <i>P</i> -42 <sub>1</sub> <i>m</i>                    | 4.184 | 0.004    | $\chi_{123}=-1.413$                                                                                                                  | 1.413 |
| Sr <sub>3</sub> (Si <sub>3</sub> O <sub>9</sub> )                    | 32542  | <i>C</i> 2                                            | 4.714 | 0.039    | $\chi_{112}=0.005$<br>$\chi_{123}=-0.006$<br>$\chi_{222}=0.007$<br>$\chi_{233}=-0.002$                                               | 0.007 |
| Sr <sub>3</sub> (TaGa <sub>3</sub> Si <sub>2</sub> O <sub>14</sub> ) | 91779  | <i>P</i> 321                                          | 3.988 | 0.066    | $\chi_{112}=-0.198$                                                                                                                  | 0.198 |

|                                                    |        |                 |       |       |                                                                                        |       |
|----------------------------------------------------|--------|-----------------|-------|-------|----------------------------------------------------------------------------------------|-------|
|                                                    |        |                 |       |       | $\chi_{222}=0.198$                                                                     |       |
| $\text{Sr}_3\text{Mg}(\text{SiO}_4)_2$             | 195459 | <i>C2</i>       | 5.068 | 0.02  | $\chi_{112}=0.043$<br>$\chi_{123}=-0.009$<br>$\chi_{222}=-0.042$<br>$\chi_{233}=0.015$ | 0.043 |
| $\text{Sr}_3\text{TaGa}_3\text{Si}_2\text{O}_{14}$ | 421591 | <i>P321</i>     | 3.987 | 0.066 | $\chi_{112}=-0.193$<br>$\chi_{222}=0.193$                                              | 0.193 |
| $\text{Sr}_3\text{TaGa}_3\text{Si}_2\text{O}_{14}$ | 380530 | <i>P321</i>     | 3.986 | 0.066 | $\chi_{112}=-0.190$<br>$\chi_{222}=0.190$                                              | 0.190 |
| $\text{Sr}_3\text{Ta}_6\text{Si}_4\text{O}_{26}$   | 15936  | <i>P-62m</i>    | 3.319 | 0.170 | $\chi_{112}=-1.036$<br>$\chi_{222}=1.036$                                              | 1.036 |
| $\text{Tl}(\text{AlSiO}_4)$                        | 195357 | <i>Pna2_1</i>   | 3.631 | 0.043 | $\chi_{113}=0.329$<br>$\chi_{223}=0.064$<br>$\chi_{333}=0.276$                         | 0.329 |
| $\text{Y}_2(\text{SiP}_4\text{O}_{15})$            | 185335 | <i>P22_12_1</i> | 5.798 | 0.059 | $\chi_{123}=0.203$                                                                     | 0.203 |
| $\text{Y}_2(\text{Si}_2\text{O}_7)$                | 74778  | <i>Pna2_1</i>   | 5.39  | 0.009 | $\chi_{113}=0.005$<br>$\chi_{223}=-0.006$<br>$\chi_{333}=0.029$                        | 0.029 |
| $\text{Y}_2\text{Si}(\text{Be}_2\text{O}_7)$       | 95553  | <i>P-421m</i>   | 5.628 | 0.034 | $\chi_{123}=-0.447$                                                                    | 0.447 |
| $\text{Y}_2\text{Si}(\text{Be}_2\text{O}_7)$       | 95552  | <i>P-42_1m</i>  | 5.629 | 0.034 | $\chi_{123}=-0.441$                                                                    | 0.441 |
| $\text{Y}_2\text{SiBe}_2\text{O}_7$                | 23233  | <i>P-42_1m</i>  | 5.628 | 0.034 | $\chi_{123}=0.429$                                                                     | 0.429 |
| $\text{Zn}_2(\text{SiO}_4)$                        | 9147   | <i>I-42d</i>    | 2.528 | 0.029 | $\chi_{123}=2.465$                                                                     | 2.465 |
